# Supplementary material for: Highly efficient simultaneous adsorption of Cd(ii), Hg(ii) and As(iii) ions from aqueous solutions by modification of graphene oxide with 3-aminopyrazole: central composite design optimization
Source: Royal Society of Chemistry journal article supplement (doi:10.1039/c7nj01450c), 2017-01-01
Supplement: c7nj01450c1.pdf [file c7nj01450c1.pdf]

*Table S1. CCD results for the adsorption of Cd(II), Hg(II), and As(III) by GO and GO-f*

| Run | pH | Adsorbent dose(mg) | Initial ion conc.(mg.L <sup>-1</sup> ) | $q_e$ (mg.g <sup>-1</sup> ) |        |         |        |        |         |
|-----|----|--------------------|----------------------------------------|-----------------------------|--------|---------|--------|--------|---------|
|     |    |                    |                                        | GO                          |        | As(III) |        | GO-f   |         |
|     |    |                    |                                        | Cd(II)                      | Hg(II) | As(III) | Cd(II) | Hg(II) | As(III) |
| 1   | 4  | 20                 | 50                                     | 25.00                       | 15.00  | 11.25   | 31.25  | 25.00  | 16.25   |
| 2   | 4  | 10                 | 20                                     | 17.00                       | 10.00  | 9.00    | 22.00  | 19.00  | 12.00   |
| 3   | 7  | 23.5               | 35                                     | 60.32                       | 53.62  | 29.04   | 67.02  | 64.04  | 37.98   |
| 4   | 7  | 15                 | 35                                     | 81.67                       | 75.83  | 35.00   | 93.33  | 89.83  | 47.83   |
| 5   | 4  | 20                 | 20                                     | 12.50                       | 7.50   | 5.50    | 15.00  | 12.50  | 9.00    |
| 6   | 4  | 10                 | 50                                     | 30.00                       | 21.25  | 20.00   | 40.00  | 35.00  | 25.00   |
| 7   | 10 | 10                 | 20                                     | 51.00                       | 42.00  | 19.00   | 70.00  | 62.00  | 21.00   |
| 8   | 7  | 15                 | 35                                     | 81.67                       | 75.83  | 33.83   | 93.33  | 89.83  | 47.83   |
| 9   | 7  | 15                 | 35                                     | 82.83                       | 77.00  | 35.00   | 93.33  | 89.83  | 49.00   |
| 10  | 7  | 15                 | 35                                     | 81.67                       | 75.83  | 35.00   | 95.67  | 89.83  | 46.67   |
| 11  | 2  | 15                 | 35                                     | 11.67                       | 9.33   | 7.00    | 15.17  | 11.67  | 10.50   |
| 12  | 10 | 20                 | 20                                     | 27.50                       | 23.00  | 11.00   | 39.50  | 33.00  | 13.00   |
| 13  | 12 | 15                 | 35                                     | 44.33                       | 31.50  | 11.67   | 70.00  | 54.83  | 18.67   |
| 14  | 7  | 6.6                | 35                                     | 169.70                      | 153.79 | 68.94   | 201.52 | 188.26 | 90.15   |
| 15  | 7  | 15                 | 60                                     | 134.00                      | 120.00 | 54.00   | 148.00 | 138.00 | 74.00   |
| 16  | 10 | 20                 | 50                                     | 61.25                       | 51.25  | 21.25   | 90.00  | 75.00  | 27.50   |
| 17  | 7  | 15                 | 35                                     | 81.67                       | 75.83  | 35.00   | 93.33  | 91.00  | 47.83   |
| 18  | 10 | 10                 | 50                                     | 117.50                      | 92.50  | 37.50   | 162.50 | 142.50 | 42.50   |
| 19  | 7  | 15                 | 35                                     | 82.83                       | 75.83  | 35.00   | 94.50  | 89.83  | 47.83   |
| 20  | 7  | 15                 | 10                                     | 24.33                       | 22.33  | 11.33   | 29.67  | 29.33  | 15.33   |
